# Supplementary material for: Three-Year Clinical Outcomes Based on Pre-Percutaneous Coronary Intervention Coronary Blood Flow Grade and Symptom-to-Balloon Time in Patients with Non-ST-Segment Elevation Myocardial Infarction
Source: MDPI journal article supplement (doi:10.3390/jcm12113654), 2023-05-24
Supplement: s1 [file s1]

## Supplementary Materials

### Three-year clinical outcomes based on pre-percutaneous coronary intervention coronary blood flow grade and symptom-to-balloon time in patients with non-ST-segment elevation myocardial infarction

#### Supplementary Online Contents

**Table S1.** Results of the collinearity test for all-cause death between the SBT <48 h and SBT  $\geq$ 48 h groups

**Table S2.** Baseline characteristics between the SBT <48 h and SBT  $\geq$ 48 h groups before and after propensity score-matched analysis

**Table S3.** Results of the collinearity test for all-cause death between the pre-PCI TIMI 0/1 and pre-PCI TIMI 2/3 groups

**Table S4.** Baseline characteristics between the pre-PCI TIMI 0/1 and pre-PCI TIMI 2/3 groups in patients with SBT <48 h or  $\geq$ 48 h

**Table S1.** Results of the collinearity test for all-cause death between the SBT <48 h and SBT  $\geq$ 48 h groups

|                     | Variance Inflation<br>Factors | Tolerance | Condition Index |
|---------------------|-------------------------------|-----------|-----------------|
| Male                | 1.308                         | 0.765     | 1.000           |
| Age                 | 2.438                         | 0.410     | 3.036           |
| LVEF                | 1.310                         | 0.763     | 3.122           |
| BMI                 | 1.173                         | 0.852     | 3.527           |
| Cardiogenic shock   | 1.315                         | 0.761     | 3.881           |
| CPR on admission    | 1.513                         | 0.661     | 3.928           |
| SDT                 | 1.041                         | 0.960     | 4.135           |
| DBT                 | 1.080                         | 0.926     | 4.352           |
| Atypical chest pain | 1.195                         | 0.837     | 4.453           |
| Dyspnea             | 1.244                         | 0.804     | 4.545           |
| Q-wave              | 1.033                         | 0.968     | 4.757           |
| T-wave inversion    | 1.102                         | 0.907     | 4.843           |
| Killip class II/III | 1.515                         | 0.660     | 5.166           |
| EMS                 | 1.089                         | 0.919     | 5.205           |
| PCI center          | 1.120                         | 0.893     | 5.349           |
| Diabetes mellitus   | 1.109                         | 0.902     | 5.412           |
| Current smoker      | 1.326                         | 0.754     | 5.673           |
| Peak CK-MB          | 1.193                         | 0.838     | 5.787           |

|                           |       |       |        |
|---------------------------|-------|-------|--------|
| Peak troponin-I           | 1.229 | 0.814 | 5.944  |
| Total cholesterol         | 4.291 | 0.233 | 6.312  |
| LDL-cholesterol           | 4.229 | 0.236 | 7.493  |
| GRACE risk score          | 3.057 | 0.327 | 8.567  |
| Clopidogrel               | 1.097 | 0.912 | 9.252  |
| LCx (IRA)                 | 3.384 | 0.296 | 10.695 |
| LAD (treated vessel)      | 2.192 | 0.456 | 12.402 |
| LCx (treated vessel)      | 2.203 | 0.454 | 14.510 |
| ACC/AHA type B2/C lesions | 1.082 | 0.924 | 22.085 |
| Transradial approach      | 1.104 | 0.906 | 27.883 |
| IVUS/OCT                  | 1.063 | 0.941 | 36.427 |
| Stent length              | 2.523 | 0.396 | 40.641 |
| Number of stents          | 2.389 | 0.418 | 68.321 |

---

SBT, symptom-to-balloon time; LVEF, left ventricular ejection fraction; BMI, body mass index; CPR, cardiopulmonary resuscitation; SDT, symptom-to-door time; DBT, door-to-balloon time; EMS, emergency medical service; PCI, percutaneous coronary intervention; CK-MB, creatine kinase myocardial band; LDL, low-density lipoprotein; GRACE, Global Registry of Acute Coronary Events; LCx, left circumflex coronary artery; IRA, infarct-related artery; LAD, left anterior descending coronary artery; ACC/AHA, American College of Cardiology/American Heart Association; IVUS, intravascular ultrasound; OCT, optical coherence tomography.

**Table S2.** Baseline characteristics between the SBT <48 h and SBT ≥48 h groups before and after propensity score-matched analysis

| Variables                    | All patients (n = 4910)               |                                       |            | Propensity score-matched patients (n = 3058) |                         |            |       |
|------------------------------|---------------------------------------|---------------------------------------|------------|----------------------------------------------|-------------------------|------------|-------|
|                              | SBT <48 h<br>(n = 3293, group<br>A+C) | SBT ≥48 h<br>(n = 1617, group<br>B+D) | p<br>value | SBT <48 h<br>(n = 1529)                      | SBT ≥48 h<br>(n = 1529) | p<br>value | SD    |
| Male, n (%)                  | 2432 (73.9)                           | 1118 (69.1)                           | 0.001      | 1073 (70.2)                                  | 1071 (70.0)             | 0.968      | 0.04  |
| Age, years                   | 63.6 ± 12.0                           | 66.6 ± 12.1                           | <0.001     | 66.2 ± 11.6                                  | 66.2 ± 12.2             | 0.881      | -0.05 |
| LVEF, %                      | 54.5 ± 10.5                           | 52.8 ± 11.9                           | <0.001     | 53.4 ± 11.1                                  | 53.3 ± 11.6             | 0.851      | 0.09  |
| BMI, kg/m <sup>2</sup>       | 24.1 ± 3.3                            | 24.0 ± 3.4                            | 0.462      | 24.1 ± 3.3                                   | 24.0 ± 3.4              | 0.517      | 0.29  |
| SBP, mmHg                    | 135.1 ± 26.9                          | 135.7 ± 25.6                          | 0.437      | 135.6 ± 26.4                                 | 135.7 ± 25.7            | 0.878      | -0.03 |
| DBP, mmHg                    | 81.5 ± 15.8                           | 80.8 ± 15.0                           | 0.133      | 80.8 ± 15.5                                  | 80.9 ± 15.1             | 0.784      | -0.07 |
| Cardiogenic shock, n (%)     | 167 (5.1)                             | 53 (3.3)                              | 0.004      | 60 (3.9)                                     | 52 (3.4)                | 0.501      | 0.27  |
| CPR on admission, n (%)      | 103 (3.1)                             | 56 (3.5)                              | 0.549      | 53 (3.5)                                     | 52 (3.4)                | 0.921      | 0.05  |
| Atypical chest pain, n (%)   | 453 (13.8)                            | 361 (22.3)                            | <0.001     | 291 (19.0)                                   | 305 (19.9)              | 0.553      | -0.23 |
| Dyspnea, n (%)               | 710 (21.6)                            | 525 (32.5)                            | <0.001     | 459 (30.0)                                   | 455 (29.8)              | 0.906      | 0.04  |
| EKG on admission             |                                       |                                       |            |                                              |                         |            |       |
| Q-wave, n (%)                | 244 (7.4)                             | 154 (9.5)                             | 0.012      | 134 (8.8)                                    | 133 (8.7)               | 0.949      | 0.03  |
| ST-segment depression, n (%) | 773 (23.5)                            | 337 (20.8)                            | 0.039      | 345 (22.6)                                   | 325 (21.3)              | 0.406      | 0.31  |
| T-wave inversion, n (%)      | 716 (21.7)                            | 429 (26.5)                            | <0.001     | 406 (26.6)                                   | 400 (26.2)              | 0.837      | 0.09  |
| Atrial fibrillation, n (%)   | 134 (4.1)                             | 74 (4.6)                              | 0.408      | 64 (4.2)                                     | 69 (4.5)                | 0.723      | -0.15 |
| Killip class II/III, n (%)   | 474 (14.4)                            | 325 (20.1)                            | <0.001     | 289 (18.9)                                   | 286 (18.7)              | 0.926      | 0.05  |
| First medical contact        |                                       |                                       |            |                                              |                         |            |       |
| EMS, n (%)                   | 397 (12.1)                            | 100 (6.2)                             | <0.001     | 99 (6.5)                                     | 100 (6.5)               | 0.942      | -0.03 |
| Non-PCI center, n (%)        | 1745 (53.0)                           | 884 (54.7)                            | 0.273      | 845 (55.3)                                   | 837 (54.7)              | 0.799      | 0.12  |
| PCI center, n (%)            | 1151 (35.0)                           | 633 (39.1)                            | 0.004      | 585 (38.3)                                   | 592 (38.7)              | 0.824      | -0.08 |
| Hypertension, n (%)          | 1715 (52.1)                           | 910 (56.3)                            | 0.006      | 874 (57.2)                                   | 857 (56.0)              | 0.559      | 0.24  |
| Diabetes mellitus, n (%)     | 965 (29.3)                            | 535 (33.1)                            | 0.008      | 511 (33.4)                                   | 497 (32.5)              | 0.617      | 0.19  |
| Dyslipidemia, n (%)          | 397 (12.1)                            | 188 (11.6)                            | 0.673      | 175 (11.4)                                   | 180 (11.8)              | 0.821      | -0.12 |
| Previous MI, n (%)           | 229 (7.0)                             | 114 (7.1)                             | 0.905      | 111 (7.3)                                    | 107 (7.0)               | 0.833      | 0.12  |
| Previous PCI, n (%)          | 328 (10.0)                            | 156 (9.6)                             | 0.760      | 153 (10.0)                                   | 150 (9.8)               | 0.904      | 0.07  |

|                                     |                 |                 |        |                 |                 |       |       |
|-------------------------------------|-----------------|-----------------|--------|-----------------|-----------------|-------|-------|
| Previous CABG, <i>n</i> (%)         | 25 (0.8)        | 15 (0.9)        | 0.613  | 15 (1.0)        | 14 (0.9)        | 0.852 | 0.10  |
| Previous HF, <i>n</i> (%)           | 50 (1.5)        | 30 (1.9)        | 0.402  | 27 (1.8)        | 28 (1.8)        | 0.892 | -0.09 |
| Previous stroke, <i>n</i> (%)       | 187 (5.7)       | 118 (7.3)       | 0.032  | 112 (7.3)       | 108 (7.1)       | 0.834 | 0.08  |
| Current smokers, <i>n</i> (%)       | 1262 (38.3)     | 508 (31.4)      | <0.001 | 498 (32.6)      | 494 (32.3)      | 0.908 | 0.06  |
| Peak CK-MB, mg/dL                   | 29.6 (7.7-99.9) | 12.3 (4.8-42.3) | <0.001 | 17.3 (5.7-56.9) | 12.9 (4.9-44.8) | 0.474 | 0.40  |
| Peak troponin-I, ng/mL              | 13.0 (2.5-24.0) | 5.0 (1.3-21.6)  | <0.001 | 6.7 (1.6-22.5)  | 5.2 (1.3-22.5)  | 0.200 | 0.46  |
| Serum creatinine (mg/L)             | 1.13 ± 1.33     | 1.20 ± 1.37     | 0.098  | 1.18 ± 1.39     | 1.18 ± 1.37     | 0.979 | 0.01  |
| Total cholesterol, mg/dL            | 180.3 ± 46.1    | 175.6 ± 45.2    | 0.001  | 176.1 ± 45.6    | 176.1 ± 44.6    | 0.974 | -0.01 |
| Triglyceride, mg/L                  | 134.4 ± 112.6   | 128.6 ± 100.4   | 0.102  | 131.4 ± 99.2    | 129.8 ± 98.3    | 0.693 | 0.16  |
| HDL cholesterol, mg/L               | 42.9 ± 11.6     | 42.2 ± 11.9     | 0.048  | 41.7 ± 10.9     | 42.3 ± 11.4     | 0.165 | -0.54 |
| LDL cholesterol, mg/L               | 113.8 ± 39.1    | 110.0 ± 38.9    | 0.003  | 111.1 ± 37.3    | 110.6 ± 36.6    | 0.712 | 0.13  |
| GRACE risk score                    | 130.0 ± 41.7    | 136.1 ± 40.5    | <0.001 | 135.4 ± 41.7    | 135.0 ± 40.5    | 0.796 | 0.09  |
| Discharge medications, <i>n</i> (%) |                 |                 |        |                 |                 |       |       |
| Aspirin, <i>n</i> (%)               | 3258 (98.9)     | 1601 (99.0)     | 0.882  | 1512 (98.9)     | 1513 (99.0)     | 0.861 | -0.10 |
| Clopidogrel, <i>n</i> (%)           | 2316 (70.3)     | 1201 (74.3)     | 0.004  | 1139 (74.5)     | 1130 (73.9)     | 0.741 | 0.14  |
| Ticagrelor, <i>n</i> (%)            | 657 (20.0)      | 289 (17.9)      | 0.083  | 270 (17.7)      | 278 (18.2)      | 0.741 | -0.13 |
| Prasugrel, <i>n</i> (%)             | 320 (9.7)       | 127 (7.9)       | 0.035  | 120 (7.8)       | 121 (7.9)       | 0.946 | -0.04 |
| BBs, <i>n</i> (%)                   | 2798 (85.0)     | 1338 (82.7)     | 0.046  | 1279 (83.6)     | 1273 (83.3)     | 0.808 | 0.08  |
| ACEI or ARBs, <i>n</i> (%)          | 2745 (83.4)     | 1282 (79.3)     | 0.001  | 1230 (80.4)     | 1226 (80.2)     | 0.891 | 0.05  |
| Statin, <i>n</i> (%)                | 3119 (94.7)     | 1508 (93.3)     | 0.043  | 1435 (93.9)     | 1431 (93.6)     | 0.823 | 0.12  |
| Anticoagulant, <i>n</i> (%)         | 56 (1.7)        | 50 (3.1)        | 0.002  | 45 (2.9)        | 39 (2.6)        | 0.580 | 0.18  |
| Infarct-related artery              |                 |                 |        |                 |                 |       |       |
| Left main, <i>n</i> (%)             | 91 (2.8)        | 57 (3.5)        | 0.155  | 49 (3.2)        | 53 (3.5)        | 0.689 | -0.17 |
| LAD, <i>n</i> (%)                   | 1376 (41.8)     | 700 (43.3)      | 0.325  | 674 (44.1)      | 658 (43.0)      | 0.584 | 0.22  |
| LCx, <i>n</i> (%)                   | 896 (27.2)      | 363 (22.4)      | <0.001 | 346 (22.6)      | 354 (23.2)      | 0.763 | -0.14 |
| RCA, <i>n</i> (%)                   | 930 (28.2)      | 484 (29.9)      | 0.227  | 460 (30.1)      | 464 (30.3)      | 0.906 | -0.04 |
| Treated vessel                      |                 |                 |        |                 |                 |       |       |
| Left main, <i>n</i> (%)             | 134 (4.1)       | 89 (5.5)        | 0.028  | 81 (5.3)        | 78 (5.1)        | 0.871 | 0.09  |
| LAD, <i>n</i> (%)                   | 1832 (55.6)     | 967 (59.8)      | 0.006  | 911 (59.6)      | 913 (59.7)      | 0.971 | -0.02 |
| LCx, <i>n</i> (%)                   | 1299 (39.4)     | 589 (36.4)      | 0.042  | 563 (36.8)      | 564 (36.9)      | 0.970 | -0.02 |

|                                               |             |             |        |             |             |       |       |
|-----------------------------------------------|-------------|-------------|--------|-------------|-------------|-------|-------|
| RCA, <i>n</i> (%)                             | 1216 (36.9) | 629 (38.9)  | 0.188  | 593 (38.8)  | 604 (39.5)  | 0.711 | -0.14 |
| ACC/AHA type B2/C lesions, <i>n</i> (%)       | 2804 (85.2) | 1356 (84.0) | 0.310  | 1291 (84.4) | 1288 (84.2) | 0.921 | 0.05  |
| Transradial approach, <i>n</i> (%)            | 1678 (51.0) | 867 (53.6)  | 0.083  | 798 (52.2)  | 816 (53.4)  | 0.538 | -0.24 |
| GP IIb/IIIa inhibitor, <i>n</i> (%)           | 306 (9.3)   | 127 (7.9)   | 0.097  | 116 (7.6)   | 114 (7.5)   | 0.945 | 0.04  |
| IVUS/OCT, <i>n</i> (%)                        | 789 (24.0)  | 452 (28.0)  | 0.003  | 426 (27.9)  | 414 (27.1)  | 0.656 | 0.18  |
| FFR, <i>n</i> (%)                             | 59 (1.8)    | 46 (2.8)    | 0.021  | 45 (2.9)    | 44 (2.9)    | 0.914 | 0.04  |
| Stent                                         |             |             |        |             |             |       |       |
| Bare-metal stent, <i>n</i> (%)                | 96 (2.9)    | 60 (3.7)    | 0.141  | 50 (3.3)    | 56 (3.7)    | 0.621 | -0.22 |
| 1 <sup>st</sup> -generation DES, <i>n</i> (%) | 122 (3.7)   | 65 (4.0)    | 0.580  | 61 (4.0)    | 59 (3.9)    | 0.926 | 0.05  |
| 2 <sup>nd</sup> -generation DES, <i>n</i> (%) | 3075 (93.4) | 1492 (92.3) | 0.153  | 1418 (92.7) | 1414 (92.5) | 0.836 | 0.07  |
| Stent diameter (mm)                           | 3.08 ± 0.44 | 3.06 ± 0.43 | 0.121  | 3.06 ± 0.42 | 3.07 ± 0.43 | 0.794 | -0.23 |
| Stent length (mm)                             | 28.9 ± 13.4 | 30.5 ± 15.1 | <0.001 | 30.3 ± 14.1 | 30.2 ± 14.8 | 0.923 | 0.06  |
| Number of stents                              | 1.19 ± 0.44 | 1.24 ± 0.49 | 0.002  | 1.23 ± 0.49 | 1.23 ± 0.48 | 0.765 | 0.24  |

Values are means ± standard deviation or median (interquartile range) or numbers and percentages. The *p* values for continuous data were obtained from the unpaired t-test. The *p* values for categorical data were obtained from the chi-square or Fisher's exact test. Pre-PCI TIMI, pre-percutaneous coronary intervention thrombolysis in myocardial infarction flow grade; SBT, symptom-to-balloon time; LVEF, left ventricular ejection fraction; BMI, body mass index; SBP, systolic blood pressure; DBP, diastolic blood pressure; CPR, cardiopulmonary resuscitation; EKG, electrocardiogram; EMS, emergency medical service; MI, myocardial infarction; CABG, coronary artery bypass graft; HF, heart failure; CK-MB, creatine kinase myocardial band; HDL, high-density lipoprotein; LDL, low-density lipoprotein; GRACE, Global Registry of Acute Coronary Events; BBs, beta-blockers; ACEIs, angiotensin converting enzyme inhibitors; ARBs, angiotensin receptor blockers; LAD, left anterior descending coronary artery; LCx, left circumflex coronary artery; RCA, right coronary artery; ACC/AHA, American College of Cardiology/American Heart Association; GP, glycoprotein; IVUS/OCT, intravascular ultrasound/optical coherence tomography; FFR, fractional flow reserve; DES, drug-eluting stent.

**Table S3.** Results of the collinearity test for all-cause death between the pre-PCI TIMI 0/1 and pre-PCI TIMI 2/3 groups

|                                 | Variance Inflation<br>Factors | Tolerance | Condition Index |
|---------------------------------|-------------------------------|-----------|-----------------|
| Male                            | 1.247                         | 0.802     | 1.000           |
| Age                             | 2.504                         | 0.399     | 3.243           |
| LVEF                            | 1.315                         | 0.761     | 3.334           |
| BMI                             | 1.211                         | 0.826     | 3.421           |
| SBP                             | 3.181                         | 0.314     | 3.928           |
| DBP                             | 2.933                         | 0.341     | 4.329           |
| Cardiogenic shock               | 1.291                         | 0.774     | 4.371           |
| CPR on admission                | 1.520                         | 0.658     | 3.788           |
| SDT                             | 1.035                         | 0.966     | 3.932           |
| DBT                             | 1.084                         | 0.923     | 3.991           |
| Atypical chest pain             | 1.198                         | 0.835     | 4.202           |
| Dyspnea                         | 1.246                         | 0.802     | 4.258           |
| Q-wave                          | 1.038                         | 0.963     | 5.015           |
| Killip class II/III             | 1.579                         | 0.633     | 5.128           |
| Hypertension                    | 1.204                         | 0.830     | 5.457           |
| Diabetes mellitus               | 1.146                         | 0.872     | 5.311           |
| Dyslipidemia                    | 1.044                         | 0.958     | 5.627           |
| Peak CK-MB                      | 1.195                         | 0.837     | 5.705           |
| Peak troponin-I                 | 1.225                         | 0.817     | 6.057           |
| Total cholesterol               | 4.335                         | 0.231     | 6.094           |
| LDL-cholesterol                 | 4.250                         | 0.235     | 6.322           |
| GRACE risk score                | 3.684                         | 0.271     | 6.831           |
| Ticagrelor                      | 1.061                         | 0.943     | 7.279           |
| Left main (IRA)                 | 3.043                         | 0.329     | 8.551           |
| LAD (IRA)                       | 3.641                         | 0.275     | 9.253           |
| LCx (IRA)                       | 4.560                         | 0.219     | 9.368           |
| RCA (IRA)                       | 2.878                         | 0.347     | 10.219          |
| Left main (treated vessel)      | 2.241                         | 0.425     | 11.690          |
| LAD (treated vessel)            | 2.321                         | 0.431     | 12.427          |
| LCx (treated vessel)            | 3.122                         | 0.446     | 13.224          |
| RCA (treated vessel)            | 1.085                         | 0.320     | 16.255          |
| ACC/AHA type B2/C lesions       | 1.108                         | 0.922     | 22.012          |
| Transradial approach            | 1.085                         | 0.902     | 22.715          |
| GP IIb/IIIa inhibitor, n (%)    | 1.514                         | 0.934     | 24.089          |
| IVUS/OCT                        | 1.108                         | 0.907     | 25.542          |
| FFR                             | 1.104                         | 0.987     | 28.833          |
| 1 <sup>st</sup> -generation DES | 2.083                         | 0.480     | 36.509          |
| 2 <sup>nd</sup> -generation DES | 2.165                         | 0.462     | 42.186          |
| Stent diameter                  | 1.221                         | 0.819     | 45.193          |
| Stent length                    | 2.602                         | 0.384     | 55.564          |
| Number of stents                | 2.415                         | 0.414     | 90.710          |

Pre-PCI TIMI, pre-percutaneous coronary intervention thrombolysis in myocardial infarction flow grade; LVEF, left ventricular ejection fraction; BMI, body mass index; SBP, systolic blood pressure; DBP, diastolic blood pressure; CPR, cardiopulmonary resuscitation; SDT, symptom-

to-door time; DBT, door-to-balloon time; CK-MB, creatine kinase myocardial band; LDL, low-density lipoprotein; GRACE, Global Registry of Acute Coronary Events; IRA, infarct-related artery; LAD, left anterior descending coronary artery; LCx, left circumflex coronary artery; RCA, right coronary artery; ACC/AHA, American College of Cardiology/American Heart Association; IVUS, intravascular ultrasound; OCT, optical coherence tomography; FFR, fractional flow reserve; DES, drug-eluting stent.

**Table S4.** Baseline characteristics between the pre-PCI TIMI 0/1 and pre-PCI TIMI 2/3 groups in patients with SBT <48 h or ≥48 h

| Variables                           | SBT <48 h (n = 3293)                |                                     |                   | SBT ≥48 h (n = 1617)               |                                     |                |
|-------------------------------------|-------------------------------------|-------------------------------------|-------------------|------------------------------------|-------------------------------------|----------------|
|                                     | Pre-TIMI 0/1<br>(n = 1328, group A) | Pre-TIMI 2/3<br>(n = 1965, group C) | <i>p</i><br>value | Pre-TIMI 0/1<br>(n = 558, group B) | Pre-TIMI 2/3<br>(n = 1059, group D) | <i>p</i> value |
| Male, <i>n</i> (%)                  | 996 (75.5)                          | 1436 (73.1)                         | 0.225             | 395 (70.8)                         | 723 (68.3)                          | 0.308          |
| Age, years                          | 62.5 ± 12.2                         | 64.4 ± 11.8                         | <0.001            | 66.3 ± 12.4                        | 66.8 ± 12.0                         | 0.430          |
| LVEF, %                             | 53.4 ± 9.8                          | 55.2 ± 10.9                         | <0.001            | 50.3 ± 9.4                         | 54.1 ± 11.6                         | <0.001         |
| BMI, kg/m <sup>2</sup>              | 24.2 ± 3.4                          | 24.0 ± 3.3                          | 0.023             | 23.9 ± 3.3                         | 24.1 ± 3.5                          | 0.282          |
| SBP, mmHg                           | 133.7 ± 26.7                        | 136.0 ± 26.5                        | 0.015             | 133.0 ± 28.0                       | 137.1 ± 24.6                        | 0.003          |
| DBP, mmHg                           | 81.0 ± 16.4                         | 81.8 ± 15.4                         | 0.185             | 79.7 ± 16.0                        | 81.3 ± 14.4                         | 0.039          |
| Cardiogenic shock, <i>n</i> (%)     | 71 (5.3)                            | 96 (4.9)                            | 0.571             | 19 (3.4)                           | 34 (3.2)                            | 0.883          |
| CPR on admission, <i>n</i> (%)      | 39 (2.9)                            | 64 (3.3)                            | 0.683             | 21 (3.8)                           | 35 (3.3)                            | 0.668          |
| SDT, hours                          | 4.7 (2.0-11.3)                      | 4.0 (1.8-9.3)                       | 0.004             | 65.0 (21.5-114.2)                  | 48.0 (9.1-101.0)                    | 0.165          |
| DBT, hours                          | 6.2 (2.8-16.0)                      | 10.8 (3.6-19.9)                     | <0.001            | 24.6 (6.0-56.5)                    | 39.1 (16.7-63.2)                    | 0.133          |
| Atypical chest pain, <i>n</i> (%)   | 178 (13.4)                          | 275 (14.0)                          | 0.643             | 137 (24.6)                         | 224 (21.2)                          | 0.132          |
| Dyspnea, <i>n</i> (%)               | 297 (22.4)                          | 413 (21.0)                          | 0.365             | 202 (36.2)                         | 323 (30.5)                          | 0.022          |
| EKG on admission                    |                                     |                                     |                   |                                    |                                     |                |
| Q-wave, <i>n</i> (%)                | 133 (10.0)                          | 111 (5.6)                           | <0.001            | 63 (11.3)                          | 91 (8.6)                            | 0.090          |
| ST-segment depression, <i>n</i> (%) | 308 (23.2)                          | 465 (23.7)                          | 0.769             | 112 (20.1)                         | 225 (21.2)                          | 0.607          |
| T-wave inversion, <i>n</i> (%)      | 279 (21.0)                          | 437 (22.2)                          | 0.413             | 144 (25.8)                         | 285 (26.9)                          | 0.678          |
| Atrial fibrillation, <i>n</i> (%)   | 48 (3.6)                            | 86 (4.4)                            | 0.323             | 25 (4.5)                           | 49 (4.6)                            | 0.893          |
| Killip class II/III, <i>n</i> (%)   | 225 (16.9)                          | 249 (12.7)                          | 0.001             | 143 (25.6)                         | 182 (17.2)                          | <0.001         |
| First medical contact               |                                     |                                     |                   |                                    |                                     |                |
| EMS, <i>n</i> (%)                   | 167 (12.6)                          | 230 (11.7)                          | 0.478             | 31 (5.6)                           | 69 (6.5)                            | 0.515          |
| Non-PCI center, <i>n</i> (%)        | 698 (52.6)                          | 1047 (53.3)                         | 0.696             | 310 (55.6)                         | 574 (54.2)                          | 0.636          |
| PCI center, <i>n</i> (%)            | 463 (34.9)                          | 688 (35.0)                          | 0.941             | 217 (38.9)                         | 416 (39.3)                          | 0.915          |
| Hypertension, <i>n</i> (%)          | 638 (48.0)                          | 1077 (54.8)                         | <0.001            | 293 (52.5)                         | 617 (58.3)                          | 0.027          |
| Diabetes mellitus, <i>n</i> (%)     | 334 (25.2)                          | 631 (32.1)                          | <0.001            | 176 (31.5)                         | 359 (33.9)                          | 0.345          |
| Dyslipidemia, <i>n</i> (%)          | 139 (10.5)                          | 258 (13.1)                          | 0.022             | 59 (10.6)                          | 129 (12.2)                          | 0.370          |



|                                     |                   |                 |        |                 |                 |        |
|-------------------------------------|-------------------|-----------------|--------|-----------------|-----------------|--------|
| Previous MI, <i>n</i> (%)           | 97 (7.3)          | 132 (6.7)       | 0.530  | 33 (5.9)        | 81 (7.6)        | 0.220  |
| Previous PCI, <i>n</i> (%)          | 132 (9.9)         | 196 (10.0)      | 0.974  | 48 (8.6)        | 108 (10.2)      | 0.330  |
| Previous CABG, <i>n</i> (%)         | 6 (0.5)           | 19 (1.0)        | 0.095  | 5 (0.9)         | 10 (0.9)        | 0.923  |
| Previous HF, <i>n</i> (%)           | 14 (1.1)          | 36 (1.8)        | 0.082  | 7 (1.3)         | 23 (2.2)        | 0.246  |
| Previous stroke, <i>n</i> (%)       | 68 (5.1)          | 119 (6.1)       | 0.283  | 37 (6.6)        | 81 (7.6)        | 0.483  |
| Current smokers, <i>n</i> (%)       | 530 (39.9)        | 732 (37.3)      | 0.125  | 175 (31.5)      | 332 (31.4)      | 0.955  |
| Peak CK-MB, mg/dL                   | 61.2 (11.5-153.9) | 19.8 (6.5-65.5) | <0.001 | 15.0 (5.0-51.8) | 10.8 (4.5-32.2) | 0.079  |
| Peak troponin-I, ng/mL              | 19.1 (4.8-42.7)   | 5.4 (1.2-20.7)  | <0.001 | 7.1 (2.2-20.8)  | 3.0 (0.8-10.6)  | <0.001 |
| Serum creatinine (mg/L)             | 1.10 ± 1.28       | 1.14 ± 1.37     | 0.390  | 1.23 ± 1.50     | 1.18 ± 1.29     | 0.455  |
| Total cholesterol, mg/dL            | 186.6 ± 46.8      | 176.1 ± 45.1    | <0.001 | 179.5 ± 45.5    | 173.5 ± 44.9    | 0.013  |
| Triglyceride, mg/L                  | 136.1 ± 125.2     | 133.2 ± 137.4   | 0.552  | 128.2 ± 116.0   | 128.8 ± 90.9    | 0.922  |
| HDL cholesterol, mg/L               | 42.9 ± 11.5       | 42.9 ± 11.7     | 0.975  | 42.0 ± 11.8     | 42.3 ± 11.9     | 0.601  |
| LDL cholesterol, mg/L               | 118.4 ± 39.8      | 111.2 ± 38.5    | <0.001 | 112.5 ± 38.1    | 109.0 ± 39.2    | 0.108  |
| GRACE risk score                    | 128.7 ± 42.4      | 130.9 ± 41.2    | 0.147  | 139.2 ± 43.3    | 134.5 ± 38.8    | 0.031  |
| Discharge medications, <i>n</i> (%) |                   |                 |        |                 |                 |        |
| Aspirin, <i>n</i> (%)               | 1316 (99.1)       | 1942 (98.8)     | 0.494  | 552 (98.9)      | 1049 (99.1)     | 0.796  |
| Clopidogrel, <i>n</i> (%)           | 951 (71.6)        | 1365 (69.5)     | 0.199  | 428 (76.7)      | 773 (73.0)      | 0.107  |
| Ticagrelor, <i>n</i> (%)            | 239 (18.0)        | 418 (21.3)      | 0.021  | 82 (14.7)       | 207 (19.5)      | 0.017  |
| Prasugrel, <i>n</i> (%)             | 138 (10.4)        | 182 (9.3)       | 0.308  | 48 (8.6)        | 79 (7.5)        | 0.437  |
| BBs, <i>n</i> (%)                   | 1132 (85.2)       | 1666 (84.8)     | 0.728  | 456 (81.7)      | 882 (83.3)      | 0.447  |
| ACEI or ARBs, <i>n</i> (%)          | 1097 (82.6)       | 1648 (83.9)     | 0.341  | 446 (79.9)      | 879 (83.0)      | 0.135  |
| Statin, <i>n</i> (%)                | 1251 (94.2)       | 1868 (95.1)     | 0.302  | 515 (92.3)      | 993 (93.8)      | 0.297  |
| Anticoagulant, <i>n</i> (%)         | 38 (2.9)          | 43 (2.2)        | 0.251  | 22 (3.9)        | 33 (3.1)        | 0.389  |
| Infarct-related artery              |                   |                 |        |                 |                 |        |
| Left main, <i>n</i> (%)             | 12 (0.9)          | 79 (4.0)        | <0.001 | 7 (1.3)         | 50 (4.7)        | <0.001 |
| LAD, <i>n</i> (%)                   | 410 (30.9)        | 966 (49.2)      | <0.001 | 195 (34.9)      | 505 (47.7)      | <0.001 |
| LCx, <i>n</i> (%)                   | 446 (33.6)        | 450 (22.9)      | <0.001 | 128 (22.9)      | 235 (22.2)      | 0.754  |
| RCA, <i>n</i> (%)                   | 460 (34.6)        | 470 (23.9)      | <0.001 | 215 (38.5)      | 269 (25.4)      | <0.001 |
| Treated vessel                      |                   |                 |        |                 |                 |        |
| Left main, <i>n</i> (%)             | 28 (2.1)          | 106 (5.4)       | <0.001 | 20 (3.6)        | 69 (6.5)        | 0.016  |

|                                               |             |             |        |             |             |        |
|-----------------------------------------------|-------------|-------------|--------|-------------|-------------|--------|
| LAD, <i>n</i> (%)                             | 605 (45.6)  | 1227 (62.4) | <0.001 | 299 (53.6)  | 668 (63.1)  | <0.001 |
| LCx, <i>n</i> (%)                             | 597 (45.0)  | 702 (35.7)  | <0.001 | 209 (37.5)  | 380 (35.9)  | 0.550  |
| RCA, <i>n</i> (%)                             | 565 (42.5)  | 651 (33.1)  | <0.001 | 257 (46.1)  | 372 (35.1)  | <0.001 |
| ACC/AHA type B2/C lesions, <i>n</i> (%)       | 1148 (86.4) | 1656 (84.3) | 0.090  | 493 (88.4)  | 863 (81.5)  | 0.001  |
| Transradial approach, <i>n</i> (%)            | 567 (42.7)  | 1111 (56.5) | <0.001 | 270 (48.4)  | 597 (56.4)  | 0.002  |
| GP IIb/IIIa inhibitor, <i>n</i> (%)           | 193 (14.5)  | 113 (5.8)   | <0.001 | 74 (13.3)   | 53 (5.0)    | <0.001 |
| IVUS/OCT, <i>n</i> (%)                        | 236 (17.8)  | 553 (28.1)  | <0.001 | 135 (24.2)  | 317 (29.9)  | 0.014  |
| FFR, <i>n</i> (%)                             | 15 (1.1)    | 44 (2.2)    | 0.022  | 10 (1.8)    | 36 (3.4)    | 0.082  |
| Stents                                        |             |             |        |             |             |        |
| Bare-metal stent, <i>n</i> (%)                | 30 (2.3)    | 66 (3.4)    | 0.073  | 18 (3.2)    | 42 (4.0)    | 0.492  |
| 1 <sup>st</sup> -generation DES, <i>n</i> (%) | 43 (3.2)    | 79 (4.0)    | 0.260  | 13 (2.3)    | 52 (4.9)    | 0.011  |
| 2 <sup>nd</sup> -generation DES, <i>n</i> (%) | 1255 (94.5) | 1820 (92.6) | 0.038  | 527 (94.4)  | 965 (91.1)  | 0.019  |
| Stent diameter (mm)                           | 3.04 ± 0.42 | 3.12 ± 0.44 | <0.001 | 3.02 ± 0.40 | 3.09 ± 0.44 | 0.001  |
| Stent length (mm)                             | 30.4 ± 13.8 | 28.0 ± 13.1 | <0.001 | 32.7 ± 16.2 | 29.3 ± 14.3 | <0.001 |
| Number of stents                              | 1.21 ± 0.47 | 1.18 ± 0.42 | 0.023  | 1.26 ± 0.51 | 1.22 ± 0.48 | 0.155  |

Values are means ± standard deviation or median (interquartile range) or numbers and percentages. The *p* values for continuous data were obtained from the unpaired t-test. The *p* values for categorical data were obtained from the chi-square or Fisher's exact test. Pre-PCI TIMI, pre-percutaneous coronary intervention thrombolysis in myocardial infarction flow grade; SBT, symptom-to-balloon time; LVEF, left ventricular ejection fraction; BMI, body mass index; SBP, systolic blood pressure; DBP, diastolic blood pressure; CPR, cardiopulmonary resuscitation; SDT, symptom-to-door time; DBT, door-to-balloon time; EKG, electrocardiogram; EMS, emergency medical service; MI, myocardial infarction; CABG, coronary artery bypass graft; HF, heart failure; CK-MB, creatine kinase myocardial band; HDL, high-density lipoprotein; LDL, low-density lipoprotein; GRACE, Global Registry of Acute Coronary Events; BBs, beta-blockers; ACEIs, angiotensin converting enzyme inhibitors; ARBs, angiotensin receptor blockers; LAD, left anterior descending coronary artery; LCx, left circumflex coronary artery; RCA, right coronary artery; ACC/AHA, American College of Cardiology/American Heart Association; GP, glycoprotein; IVUS/OCT, intravascular ultrasound/optical coherence tomography; FFR, fractional flow reserve; DES, drug-eluting stent.
